# Supplementary material
Source: HighWire-hosted journal article supplement (https://jnm.snmjournals.org/highwire/filestream/103393/field_highwire_adjunct_files/0/255745_Supplemental_Data.pdf)
Supplement: 255745_Supplemental_Data.pdf [file 255745_Supplemental_Data.pdf]

Supplemental table 1. Relation between healthy liver-absorbed dose (Gy) and clinical toxicity based on linear regression analyses with parenchymal dose as the dependent variable.

| <b>Independent variable</b> | <b>Number of patients with toxicity</b> | <i>CTCAE grade 0 -V</i>                                                                                            |                                      |
|-----------------------------|-----------------------------------------|--------------------------------------------------------------------------------------------------------------------|--------------------------------------|
|                             |                                         | <b>Mean change in healthy liver-absorbed dose (Gy) per step increase in CTCAE grade category (95% CI); p-value</b> | <b>Adjusted for treated fraction</b> |
| Any variable, highest grade | 22                                      | -3.2 (-14.3 - 7.9); 0.55                                                                                           | -3.6 (-14.5 - 7.2); 0.49             |
| Abdominal pain              | 10                                      | 1.3 (-60.8 - 63.4); 0.96                                                                                           | -10.5 (-71.9 - 50.9); 0.70           |
| Nausea                      | 8                                       | -1.6 (-15.2 - 11.9); 0.81                                                                                          | -19.5 (-58.8 - 19.8); 0.26           |
| Fatigue                     | 19                                      | -2.7 (-32.0 - 26.5); 0.85                                                                                          | -1.9 (-27.4 - 23.6); 0.88            |
| Anorexia                    | 6                                       | -0.04 (-27.1 - 27.0); 0.99                                                                                         | 4.3 (-28.3 - 36.8); 0.71             |

The mean change indicates the average increase or decrease in healthy liver-absorbed dose per step increase in CTCAE grade toxicity. For example, for abdominal pain: a unit increase in toxicity results in an increase in average parenchymal dose of 1.3 Gy.

Supplemental table 2. Relation between healthy liver-absorbed dose (Gy) and cumulative laboratory toxicity over three months, based on linear regression analyses with healthy liver-absorbed dose as the dependent variable.

| Independent variable | Number of patients with toxicity | CTCAE grade 0-V                                    |                                                                                                     |
|----------------------|----------------------------------|----------------------------------------------------|-----------------------------------------------------------------------------------------------------|
|                      |                                  | Mean change (95% CI); p-value<br><i>Unadjusted</i> | Mean change (95% CI); p-value<br><i>Adjusted for tumor dose and response, and treated fraction.</i> |
| Albumin              | 5                                | -4.8 (-17.6; 7.9); 0.44                            | -4.7 (-21.9; 12.4); 0.57                                                                            |
| Bilirubin            | 3                                | 12.7 (-2.2; 27.6); 0.091                           | 22.8 (4.3;41.4); 0.019                                                                              |
| AP                   | 10                               | 5.3 (-5.3;16.0); 0.31                              | 2.5 (-8.3; 13.2), 0.64                                                                              |
| GGT                  | 8                                | 8.1 (-0.44;16.7); 0.062                            | 4.7 (-4.3; 13.6); 0.28                                                                              |
| ASAT                 | 9                                | 7.1 (-7.9;22.1); 0.34                              | 0.5 (-14.8;15.8); 0.95                                                                              |
| ALAT                 | 11                               | 14.4 (0.7;28.1); 0.041                             | 9.7 (-5.1;24.6); 0.18                                                                               |

The mean change indicates the average increase or decrease in healthy liver-absorbed dose per unit increase in CTCAE grade toxicity.

5

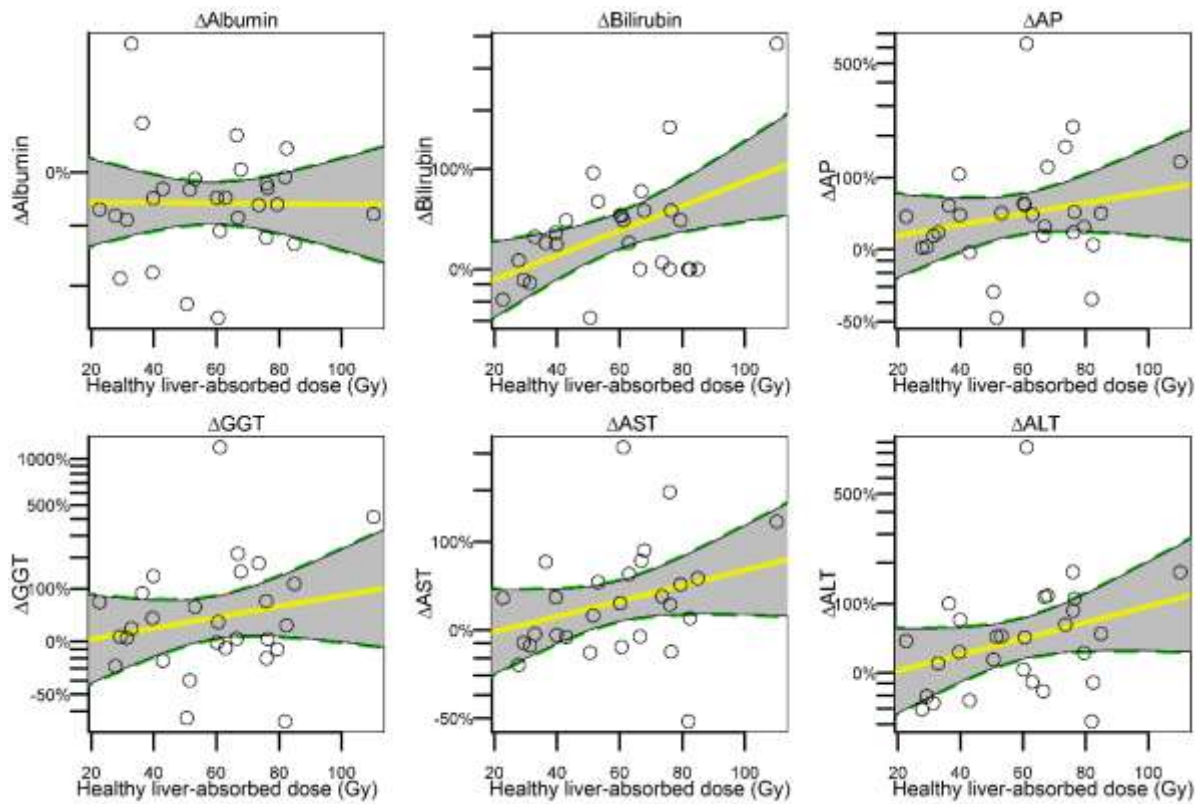

6

7 Supplemental figure 1. Graphical representation of the change in laboratory measurements vs. healthy  
8 liver-absorbed dose in Gy with 95% confidence interval

Supplemental table 3. Relation between healthy liver-absorbed dose (Gy) and change in laboratory parameters over three months, based on linear regression analyses with healthy liver-absorbed dose (per 10 Gy) as the independent variable

| <b>Dependent variable</b> | <b>Mean percent change (95% CI); p-value</b> |                                                                    |
|---------------------------|----------------------------------------------|--------------------------------------------------------------------|
|                           | <i>Unadjusted</i>                            | <i>Adjusted for tumor dose and response, and treated fraction.</i> |
| ΔAlbumin                  | -1.2% (-3.3;1.1); 0.91                       | -0.8% (-4.2;2.6); 0.93                                             |
| ΔBilirubin                | 8.1% (1.1;15.5); 0.012                       | 11.9% (0.5;23.3); 0.028                                            |
| ΔAP                       | 3.9% (-6.2;15.1); 0.34                       | 3.1% (-11.6;20.2); 0.59                                            |
| ΔGGT                      | 5.2% (-9.2;21.8); 0.41                       | 6.0% (-14.5;31.4); 0.51                                            |
| ΔASAT                     | 4.3% (-4.1;13.5); 0.21                       | 0.5 (-14.8;15.8); 0.95                                             |
| ΔALAT                     | 6.1% (-4.7;18.0); 0.20                       | 1.0% (-15.7;21.0); 0.82                                            |

The mean change indicates the increase or decrease in average toxicity per 10 Gy increase in healthy liver-absorbed dose.
